# Supplementary material
Source: publisher figshare collection journal article supplement (https://gsajournals.figshare.com/ndownloader/files/14362697)
Supplement: Supplementary file 1 [file 14362697]

# Supplemental Materials

## A) Generating females for breeding and males for RT-PCR analysis

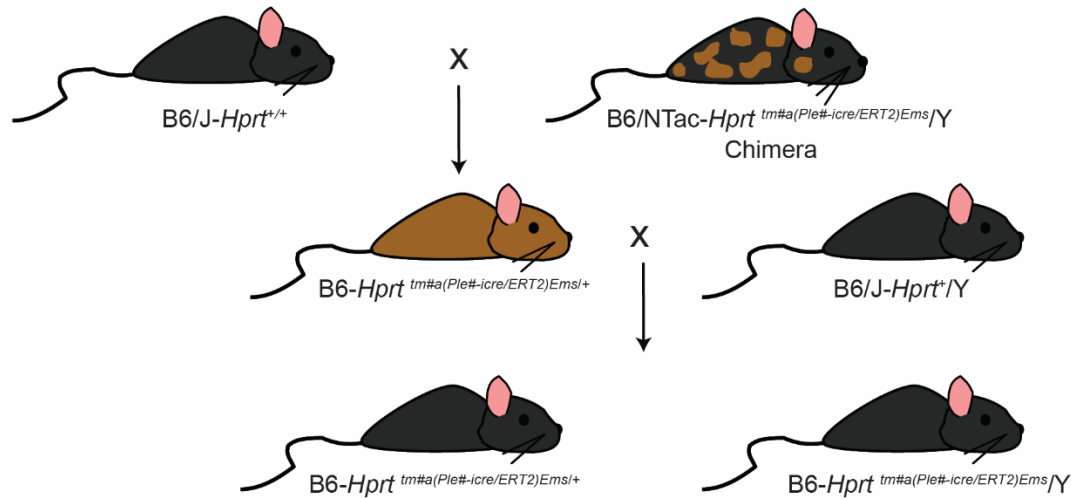

## B) Generating B6129F1 inducible cre $tm\#a$ females and males for histology

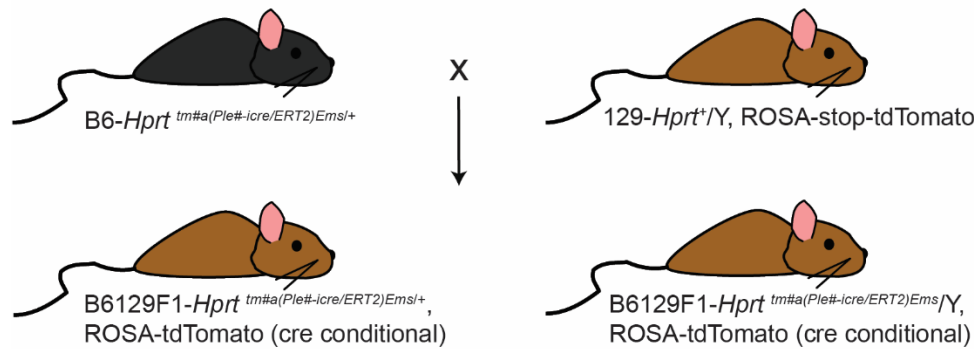

## C) Generating B6129F1 constitutive cre $tm\#b$ females and males for histology

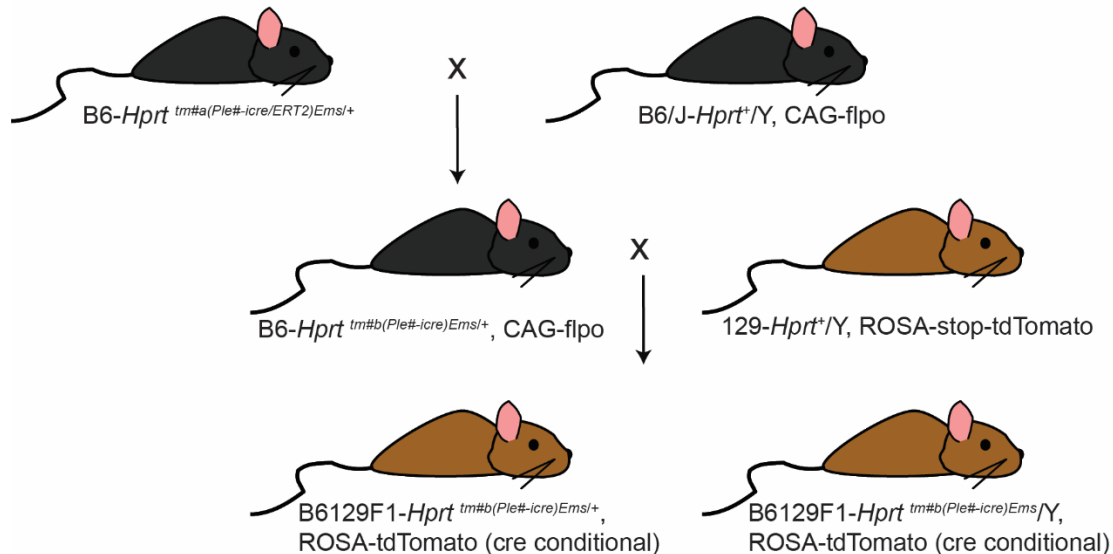

**Fig. S1 Typical breeding strategy for MaxiPromoter and MiniPromoter mice.**

**A)** Generating B6 females for breeding and males for RT-PCR analysis. Male chimeras carrying cells from the targeted B6/NTac embryonic stem cell line, for either a MaxiPromoter or MiniPromoter inserted at the *Hprt* gene on the X Chromosome, were bred to female B6/J to generate germline heterozygous female mice (B6-*Hprt*<sup>tm#a(Ple#-ice/ERT)Ems/+</sup>). These heterozygous females were then bred to B6/J males to generate both more heterozygous female mice for further breeding and hemizygous male mice (B6-*Hprt*<sup>tm#a(Ple#-ice/ERT)Ems/Y</sup>) for RT-PCR analysis. **B)** Generating B6129F1 inducible cre tm#a females and males for histology. Heterozygous female MaxiPromoter or MiniPromoter mice were bred to 129-ROSA-stop-tdTomato males to generate both B6129F1 heterozygous female and hemizygous male inducible mice, conditionally expressing tdTomato once fed tamoxifen food. **C)** Generating B6129F1 constitutive cre tm#b females and males for histology. Heterozygous female MiniPromoter mice were bred to B6/J-CAG-flpo males to generate heterozygous female constitutive cre mice (B6-*Hprt*<sup>tm#b(Ple#-ice)Ems/+</sup>), these females were then bred to 129-ROSA-stop-tdTomato males to generate both B6129F1 heterozygous female and hemizygous male constitutive cre mice, conditionally expressing tdTomato for histology. #, stands for all numbers in the collection; 129, 129S1/SvlmJ; B6/J, C57BL/6J; B6/NTac, C57BL/6NTac; B6, mixed genetic background of B6/NTac and B6/J; tm, targeted mutation; Ple, Pleiades promoter. Agouti, A<sup>w-J</sup> from B6/NTac embryonic stem cells or A<sup>w</sup> from 129; black, a from B6/J.

A) UBC-cre/ERT2 (inducible)

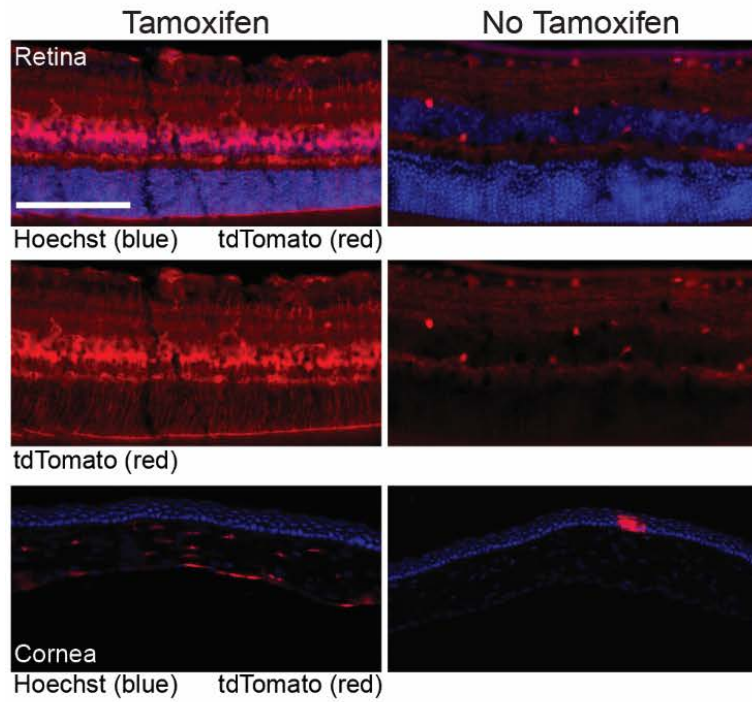

B) ACTB-cre (contitutive) C) ROSA-stop-tdTomato

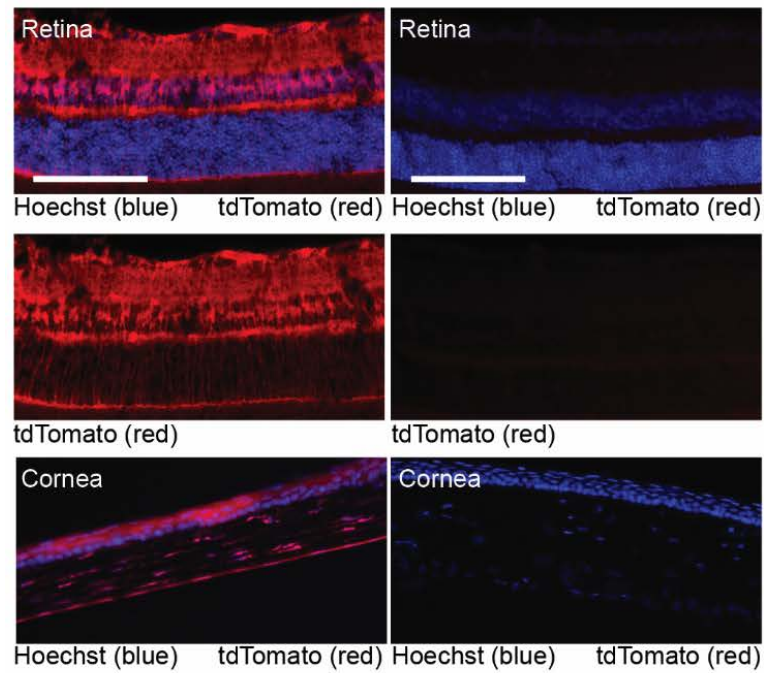

**Fig. S2 Control strains showed the typical expression of cre.**

**A)** The UBC-cre/ERT2 strain was used as a control for the tamoxifen-inducible strains. Adult mice that carried both the UBC-cre/ERT2 and ROSA-stop-tdTomato alleles were fed either tamoxifen food or no tamoxifen control food, and cre expression was examined using tdTomato epifluorescence (red). First panel: tamoxifen fed mouse stained throughout most layers of the retina; no-tamoxifen mouse also stained at a low level in the retina due to cre “leakiness”. Hoechst nuclear stain (blue). Second panel: data shown without Hoechst. Third panel: tamoxifen fed mouse stained in the stromal and endothelial layers of the cornea; no-tamoxifen mouse also stained at a low level in the cornea due to cre “leakiness”. **B)** The ACTB-cre strain was used as a control for the constitutive strains. Adult mice carried both the ACTB-cre and ROSA-stop-tdTomato alleles. First panel: mouse stained throughout most layers of the retina. Second panel: data shown without Hoechst. Third panel: mouse stained in all three layers of the cornea (epithelial, stromal, and endothelial). **C)** The ROSA-stop-tdTomato strain, not having been crossed to any cre strain, was used as a negative control for the constitutive strains. First panel: as expected, no tdTomato expression was observed in the retina. Second panel: data shown without Hoechst. Third panel: as expected, no tdTomato expression was observed in the cornea. Scale bars represent 100  $\mu\text{m}$ .

| Ple  | Gene/ Genomic Region              | Size (bp) | Design Type | Design Source         | Previously Published (PMID)  |
|------|-----------------------------------|-----------|-------------|-----------------------|------------------------------|
| 67   | <i>FEV</i>                        | 2,202     | Unaltered   | KI mouse, rAAV        | 20807748, 24761428, 27164903 |
| 94   | <i>GPR88</i>                      | 3,049     | Unaltered   | rAAV                  | 27164903                     |
| 155  | <i>PCP2</i>                       | 1,652     | Unaltered   | KI mouse, rAAV        | 24761428, 27164903           |
| 198  | <i>SLC6A4</i>                     | 2,826     | Unaltered   | rAAV                  | 27164903                     |
| 232  | <i>TNNT1</i>                      | 1,209     | Unaltered   | KI mouse              | 24761428                     |
| 251  | <i>C8ORF46</i>                    | 2,453     | Unaltered   | rAAV                  | 27164903                     |
| 253  | <i>PITX3</i>                      | 2,484     | Unaltered   | rAAV                  | 27164903                     |
| 264  | <i>NR2E1</i>                      | 3,026     | Unaltered   | rAAV                  | 27164903                     |
| 265  | <i>PCP2</i>                       | 986       | Cut Down    | Ple155                | N/AP                         |
| 266  | <i>S100B</i>                      | 2,982     | Unaltered   | rAAV                  | 27164903                     |
| 267  | <i>UGT8</i>                       | 3,014     | Unaltered   | rAAV                  | 27164903                     |
| 304  | <i>OLIG1</i>                      | 2,596     | Unaltered   | rAAV                  | 27164903                     |
| N/AP | hs671                             | 2,129     | Literature  | VISTA RI mouse (DPYD) | 17130149, 23253453, 27164903 |
| N/AP | hs1218                            | 2,338     | Literature  | VISTA RI mouse (OTX2) | 17130149, 27164903           |
| N/AP | <i>Hspa1<math>\alpha</math></i> * | 878       | Literature  | VISTA control         | 17130149                     |
| N/AP | CAGGS                             | 1,723     | Unaltered   | rAAV                  | 27164903                     |

**Table S1. Design details for the 15 MiniPromoters plus one control promoter.**

\*, synonym Hsp68; KI, knock in; N/AP, not applicable; Ple, Pleiades promoter; PMID, PubMed ID number; rAAV, recombinant adeno-associated virus; RI, random insertion; VISTA, VISTA Enhancer Project (<https://enhancer.lbl.gov/>).
